# Supplementary material for: Molecular dynamics simulation-based study to analyse the properties of entrapped water between gold and graphene 2D interfaces
Source: Royal Society of Chemistry journal article supplement (doi:10.1039/d3na00878a), 2024-01-01
Supplement: d3na00878a1.pdf [file d3na00878a1.pdf]

## Supporting Information

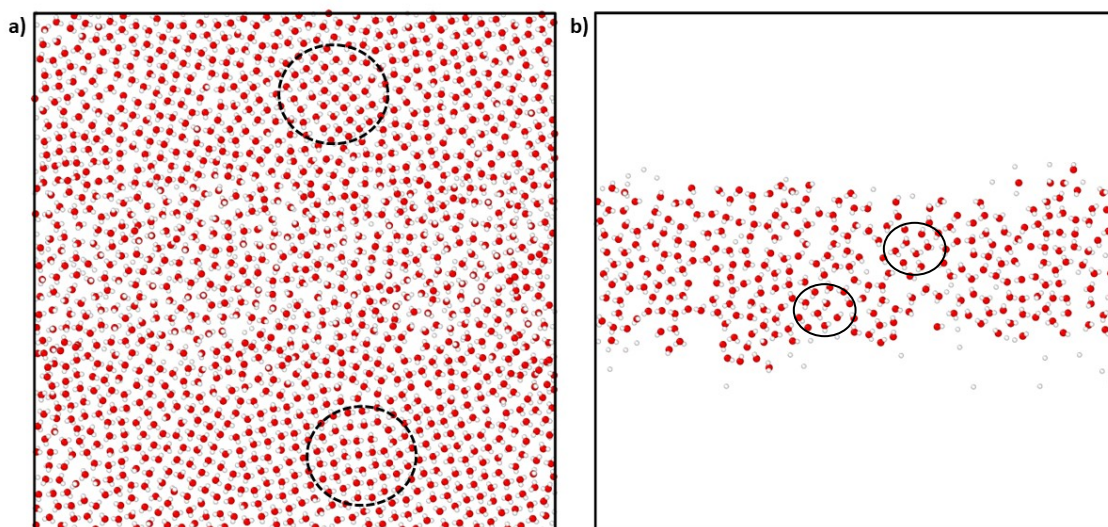

**Figure S1:** Top view of the snapshots of (a) bottom layer and (b) top layer seen from top in the case of scenario B after equilibration. The black dashed circles show the presence of square ice pattern in these water structures.

**Table S1:** LJ potential coefficients used for various pair of atoms used in the simulations (\* denotes any atom type out of Au, C, O and H)

| Atom Pairs | $\epsilon$ (meV) | $\sigma$ (Å) |
|------------|------------------|--------------|
| Au - C     | 8                | 3.42         |
| Au - O     | 25.5             | 3.6          |
| C - O      | 6.74             | 3.17         |
| O - O      | 4.06             | 3.19         |
| H - *      | 0                | 0            |
